# Supplementary material for: Early Hepatic Insulin Resistance Precedes the Onset of Diabetes in Obese C57BLKS-db/db Mice
Source: PubMed Central journal article supplement — Diabetes. 2010 Apr 14;59(7):1616–25. doi: 10.2337/db09-0878 (PMC2889760; doi:10.2337/db09-0878), 2010-04-14
Supplement: supp_db09-0878_onlineappendix.pdf [file supp_db09-0878_onlineappendix.pdf]

## ONLINE APPENDIX

### Supplemental Table 1.

| Gene          | Primer 1                        | Primer 2                       |
|---------------|---------------------------------|--------------------------------|
| Srebp1c       | CGG AGC CAT GGA TTG GAC ATT TGA | GGA GAG TTG GCA CCT GGG CT     |
| LXR $\alpha$  | GCC TGC GCG TCA CGC CTT         | GTA GGA AGC CAG GGA GCT        |
| Ppar $\gamma$ | CGA GGG CGA TCT TGA CAG GA      | GGC CAC CTC TTT GCT CTG CT     |
| Acc1          | GCA GAT CCG CAG CTT GGT         | CGT GGA AGG GGA ATC CAT        |
| Fas           | CGT GTT GGC CTA CAC CCA GAG CT  | GGC AGC AGG GCC TCC AGC ACC TT |
| Acl           | GTG GAC ATG CTC AGG AAC T       | CTG GTC AAG GTA GTG CCC A      |
| Scd1          | GGT GAT GTT CCA GAG GAG GTA CT  | GGT GCT AAC GAA CAG GCT        |
| Me1           | CCT CAC CAC TCG TGA GGT CAT     | CGA AAC GCC TCG AAT GGT        |
| Gpat          | GCC TAC AGC TCT GCT GCC AT      | GTA TGT GGC ACT CTC AGC GT     |
| Lpin1         | GTC CAG TGT TTG ACA GAC         | GGG TTC ACA GTG AAG ATC CTA T  |
| Dgat2         | GCC CTG CGC CAT GGA GCT         | CCC CAG GAA CCC TCC TCA        |
| Gk            | CAA GCT GCA CCC GAG CTT         | GCC ACC GCA GAG ACC AGT        |
| Cd36          | CGA CTG CAG GTC AAC ATA         | CCA ATG GTC CCA GTC TCA        |
| Pepck         | CCG TAG ACC TGA AGG TGT         | GGC AAA GGG GTC GTG CAT        |
| G6p           | CGT ATG GAT TCC GGT GTT         | CCA CAG CAA TGC CTG ACA        |
| Fbp           | GTT CCC TCC GGA TGG TTC A       | CAG CAG CCG CAG CTT TCC A      |
| Tbp           | ACC CTT CAC CAA TGA CTC CTA TG  | ATG ATG ACT GCA GCA AAT CGC    |
| Hprt          | GGT GGA GAT GAT CTC TCA         | CAC CAG CAA GCTTGC AAC CT      |

**Supplemental Table 2a.** Plasma traits in 4-hour fasted lean wild-type (B6 and BKS) and genetically obese (B6-db and BKS-db) male mice.

| Age  | Plasma analyte            | B6          |    | BKS         |    | B6-db       |    | BKS-db      |    |
|------|---------------------------|-------------|----|-------------|----|-------------|----|-------------|----|
|      |                           | Mean ± SEM  | n  |
| 1-mo | Triglycerides (mg/dl)     | 33.5 ± 9.07 | 4  | 41.7 ± 12.6 | 4  | 23.9 ± 2.82 | 10 | 45.2 ± 3.67 | 10 |
|      | Total cholesterol (mg/dl) | 107 ± 3.84  | 4  | 93.5 ± 4.17 | 4  | 163 ± 5.19  | 10 | 113 ± 5.33  | 10 |
|      | HDL-cholesterol (mg/dl)   | 78.7 ± 2.59 | 4  | 60.2 ± 4.50 | 4  | 115 ± 4.27  | 10 | 78.0 ± 4.03 | 10 |
|      | Unesterified chol (mg/dl) | 29.7 ± 2.21 | 4  | 24.7 ± 2.14 | 4  | 40.0 ± 1.59 | 10 | 26.6 ± 1.72 | 10 |
|      | Free fatty acids (mg/dl)  | 13.7 ± 0.25 | 4  | 17.0 ± 1.90 | 4  | 43.4 ± 2.36 | 10 | 27.3 ± 1.11 | 10 |
|      | Glucose (mg/dl)           | 183 ± 2.66  | 4  | 148 ± 6.82  | 4  | 306 ± 36.3  | 10 | 229 ± 29.1  | 10 |
|      | Insulin (pg/ml)           | 437 ± 81.0  | 7  | 691 ± 67.1  | 16 | 4011 ± 553  | 10 | 9868 ± 794  | 10 |
| 3-mo | Triglycerides (mg/dl)     | 43.9 ± 3.86 | 10 | 43.6 ± 3.28 | 10 | 51.8 ± 6.78 | 6  | 59.2 ± 9.56 | 10 |
|      | Total cholesterol (mg/dl) | 93.4 ± 1.80 | 10 | 87.8 ± 4.99 | 10 | 191 ± 13.7  | 6  | 150 ± 3.13  | 10 |
|      | HDL-cholesterol (mg/dl)   | 78.2 ± 1.73 | 10 | 59.0 ± 4.75 | 10 | 142 ± 9.08  | 6  | 115 ± 1.86  | 10 |
|      | Unesterified chol (mg/dl) | 25.3 ± 0.47 | 10 | 25.3 ± 0.52 | 10 | 45.7 ± 4.84 | 6  | 31.8 ± 1.37 | 10 |
|      | Free fatty acids (mg/dl)  | 52.3 ± 2.18 | 10 | 21.9 ± 1.15 | 10 | 40.3 ± 2.51 | 6  | 36.9 ± 2.47 | 10 |
|      | Glucose (mg/dl)           | 179 ± 7.61  | 10 | 154 ± 3.75  | 10 | 442 ± 70.3  | 6  | 590 ± 41.5  | 10 |
|      | Insulin (pg/ml)           | 1671 ± 139  | 10 | 782 ± 88.4  | 10 | 10559 ± 415 | 6  | 6127 ± 695  | 10 |
| 7-mo | Triglycerides (mg/dl)     | 35.2 ± 2.21 | 10 | 30.5 ± 2.64 | 13 | 27.8 ± 2.66 | 12 | 105 ± 16.8  | 9  |
|      | Total cholesterol (mg/dl) | 86.2 ± 1.26 | 10 | 81.5 ± 3.47 | 13 | 232 ± 10.0  | 12 | 116 ± 6.82  | 9  |
|      | HDL-cholesterol (mg/dl)   | 75.5 ± 1.58 | 10 | 64.3 ± 3.02 | 13 | 180 ± 7.03  | 12 | 88.2 ± 10.2 | 9  |
|      | Unesterified chol (mg/dl) | 20.0 ± 0.95 | 10 | 19.8 ± 1.39 | 13 | 60.4 ± 2.88 | 12 | 25.6 ± 0.99 | 9  |
|      | Free fatty acids (mg/dl)  | 28.4 ± 1.55 | 10 | 31.6 ± 1.79 | 13 | 50.5 ± 2.12 | 12 | 45.6 ± 4.32 | 9  |
|      | Glucose (mg/dl)           | 189 ± 6.48  | 10 | 156 ± 5.71  | 13 | 268 ± 17.3  | 12 | 830 ± 45.2  | 9  |
|      | Insulin (pg/ml)           | 1538 ± 112  | 10 | 1399 ± 192  | 13 | 11903 ± 186 | 12 | 2606 ± 220  | 9  |

**Supplemental Table 2b.** The effects of strain background and db genotype on plasma traits. 2-factor ANOVA (Bonferroni post-hoc test) p values are shown (n.s., not significant).

| Age  | Plasma analyte                 | Strain background |           |                 | db genotype |             |               | Strain x db interaction |
|------|--------------------------------|-------------------|-----------|-----------------|-------------|-------------|---------------|-------------------------|
|      |                                | Main effect       | B6 vs BKS | B6-db vs BKS-db | Main effect | B6 vs B6-db | BKS vs BKS-db |                         |
| 1-mo | Triacylglycerides <sup>a</sup> | 0.013             | n.s.      | <0.001          | n.s.        | n.s.        | n.s.          | n.s.                    |
|      | Total cholesterol              | <0.001            | n.s.      | <0.001          | <0.001      | <0.001      | 0.032         | 0.009                   |
|      | HDL-cholesterol                | <0.001            | 0.038     | <0.001          | <0.001      | <0.001      | 0.019         | n.s.                    |
|      | Unesterified chol              | <0.001            | n.s.      | <0.001          | 0.008       | 0.002       | n.s.          | n.s.                    |
|      | Free fatty acids               | 0.007             | n.s.      | <0.001          | <0.001      | <0.001      | 0.003         | <0.001                  |
|      | Glucose <sup>b</sup>           | <0.001            | n.s.      | <0.001          | <0.001      | <0.001      | <0.001        | 0.014                   |
|      | Insulin <sup>b</sup>           | <0.001            | 0.013     | <0.001          | <0.001      | <0.001      | <0.001        | n.s.                    |
| 3-mo | Triacylglycerides <sup>a</sup> | n.s.              | n.s.      | n.s.            | n.s.        | n.s.        | n.s.          | n.s.                    |
|      | Total cholesterol <sup>b</sup> | 0.003             | n.s.      | 0.008           | <0.001      | <0.001      | <0.001        | n.s.                    |
|      | HDL-cholesterol <sup>b</sup>   | <0.001            | <0.001    | <0.001          | <0.001      | <0.001      | <0.001        | n.s.                    |
|      | Unesterified chol <sup>b</sup> | 0.045             | n.s.      | 0.021           | <0.001      | <0.001      | <0.001        | n.s.                    |
|      | Free fatty acids               | <0.001            | <0.001    | n.s.            | n.s.        | <0.001      | <0.001        | <0.001                  |
|      | Glucose <sup>b</sup>           | n.s.              | 0.012     | n.s.            | <0.001      | <0.001      | <0.001        | 0.007                   |
|      | Insulin <sup>a</sup>           | <0.001            | <0.001    | <0.001          | <0.001      | <0.001      | <0.001        | n.s.                    |
| 7-mo | Triacylglycerides <sup>a</sup> | <0.001            | n.s.      | <0.001          | <0.001      | n.s.        | <0.001        | <0.001                  |
|      | Total cholesterol <sup>a</sup> | <0.001            | n.s.      | <0.001          | <0.001      | <0.001      | <0.001        | <0.001                  |
|      | HDL-cholesterol <sup>b</sup>   | <0.001            | 0.002     | <0.001          | <0.001      | <0.001      | <0.001        | n.s.                    |
|      | Unesterified chol <sup>c</sup> | <0.001            | n.s.      | <0.001          | <0.001      | <0.001      | 0.007         | <0.001                  |
|      | Free fatty acids <sup>a</sup>  | n.s.              | n.s.      | n.s.            | <0.001      | <0.001      | <0.001        | n.s.                    |
|      | Glucose <sup>a</sup>           | <0.001            | 0.012     | <0.001          | <0.001      | <0.001      | <0.001        | <0.001                  |
|      | Insulin <sup>b</sup>           | <0.001            | n.s.      | <0.001          | <0.001      | <0.001      | <0.001        | 0.028                   |

Non-normally distributed trait values were transformed before ANOVA (<sup>a</sup> logarithmic, <sup>b</sup> rank, <sup>c</sup> square root transformation).

**Supplemental Table 3.** Hormone levels in 4-h-fasted male B6-*db* and BKS-*db* mice at 1 month of age (SEM, standard error of measurement; n, number of animals per group; ns, not significant; nd, not detectable; *p*, Student's t-test *p* value)

|                        | B6- <i>db</i> |    | BKS- <i>db</i> |    | <i>p</i> |
|------------------------|---------------|----|----------------|----|----------|
|                        | Mean ± SEM    | n  | Mean ± SEM     | n  |          |
| Adiponectin (µg/ml)    | 13.3 ± 1.55   | 10 | 14.6 ± 0.88    | 10 | ns       |
| Leptin (ng/ml)         | 30.0 ± 4.0    | 5  | 27.2 ± 4.1     | 5  | ns       |
| Resistin (ng/ml)       | 5.37 ± 0.59   | 5  | 5.15 ± 1.34    | 5  | ns       |
| Corticosterone (ng/ml) | 155 ± 10.9    | 5  | 149 ± 21.9     | 4  | ns       |
| Glucagon (pg/ml)       | 377 ± 72.3    | 4  | 455 ± 83.7     | 4  | ns       |
| TNFα                   | nd            | 5  | nd             | 5  |          |
| IL-6                   | nd            | 5  | nd             | 5  |          |
